# Supplementary material for: DNApi: A De Novo Adapter Prediction Algorithm for Small RNA Sequencing Data
Source: PLoS One. 2016 Oct 13;11(10):e0164228. doi: 10.1371/journal.pone.0164228 (PMC5063419; doi:10.1371/journal.pone.0164228)
Supplement: S1 Table — (XLS) [file pone.0164228.s002.xls]

## Sheet: Table S1
GEO series	GEO ID	SRA ID	Sequencing platform	Adapter type	Read length	Raw read counts	3´ adapter sequence in GEO	Submission date
GSE19812	GSM494809	SRR039190	Illumina_Genome_Analyzer	uniform	35	5401752	TCGTATGCCGTCTTCTGCTTG	2010-01-08
GSE19812	GSM494810	SRR039191	Illumina_Genome_Analyzer	uniform	33	3302389	TCGTATGCCGTCTTCTGCTTG	2010-01-08
GSE29173	GSM715503	SRR191393	Illumina_Genome_Analyzer_IIx	index	36	232417	TCCTATCGTATGCCGTCTTCTGCTTGT	2011-05-10
GSE29173	GSM715504	SRR191394	Illumina_Genome_Analyzer_IIx	index	36	120469	TCACTTCGTATGCCGTCTTCTGCTTGT	2011-05-10
GSE29173	GSM715505	SRR191395	Illumina_Genome_Analyzer_IIx	index	36	16474	TCCACTCGTATGCCGTCTTCTGCTTGT	2011-05-10
GSE29173	GSM715506	SRR191396	Illumina_Genome_Analyzer_IIx	index	36	176620	TCGCGTCGTATGCCGTCTTCTGCTTGT	2011-05-10
GSE29173	GSM715507	SRR191397	Illumina_Genome_Analyzer_IIx	index	36	269829	TCGATTCGTATGCCGTCTTCTGCTTGT	2011-05-10
GSE29173	GSM715508	SRR191398	Illumina_Genome_Analyzer_IIx	index	36	148361	TCATCTCGTATGCCGTCTTCTGCTTGT	2011-05-10
GSE29173	GSM715509	SRR191399	Illumina_Genome_Analyzer_IIx	index	36	218936	TCCGTTCGTATGCCGTCTTCTGCTTGT	2011-05-10
GSE29173	GSM715510	SRR191400	Illumina_Genome_Analyzer_IIx	index	36	150574	TCTCCTCGTATGCCGTCTTCTGCTTGT	2011-05-10
GSE29173	GSM715511	SRR191401	Illumina_Genome_Analyzer_IIx	index	36	177296	TCTGATCGTATGCCGTCTTCTGCTTGT	2011-05-10
GSE29173	GSM715512	SRR191402	Illumina_Genome_Analyzer_IIx	index	36	298636	TTAAGTCGTATGCCGTCTTCTGCTTGT	2011-05-10
GSE29173	GSM715513	SRR191403	Illumina_Genome_Analyzer_IIx	index	36	110070	TCTAGTCGTATGCCGTCTTCTGCTTGT	2011-05-10
GSE29173	GSM715514	SRR191404	Illumina_Genome_Analyzer_IIx	index	36	430470	TCATCTCGTATGCCGTCTTCTGCTTGT	2011-05-10
GSE29173	GSM715515	SRR191405	Illumina_Genome_Analyzer_IIx	index	36	394262	TCCGTTCGTATGCCGTCTTCTGCTTGT	2011-05-10
GSE29173	GSM715516	SRR191406	Illumina_Genome_Analyzer_IIx	index	36	904406	TCACTTCGTATGCCGTCTTCTGCTTGT	2011-05-10
GSE29173	GSM715517	SRR191407	Illumina_Genome_Analyzer_IIx	index	36	295812	TCCTATCGTATGCCGTCTTCTGCTTGT	2011-05-10
GSE29173	GSM715518	SRR191408	Illumina_Genome_Analyzer_IIx	index	36	282782	TCGATTCGTATGCCGTCTTCTGCTTGT	2011-05-10
GSE29173	GSM715519	SRR191409	Illumina_Genome_Analyzer_IIx	index	36	458801	TCACTTCGTATGCCGTCTTCTGCTTGT	2011-05-10
GSE29173	GSM715520	SRR191410	Illumina_Genome_Analyzer_IIx	index	36	487009	TCGATTCGTATGCCGTCTTCTGCTTGT	2011-05-10
GSE29173	GSM715521	SRR191411	Illumina_Genome_Analyzer_IIx	index	36	172466	TCCACTCGTATGCCGTCTTCTGCTTGT	2011-05-10
GSE29173	GSM715522	SRR191412	Illumina_Genome_Analyzer_IIx	index	36	232373	TCTCCTCGTATGCCGTCTTCTGCTTGT	2011-05-10
GSE29173	GSM715523	SRR191413	Illumina_Genome_Analyzer_IIx	index	36	230451	TCGCGTCGTATGCCGTCTTCTGCTTGT	2011-05-10
GSE29173	GSM715524	SRR191414	Illumina_Genome_Analyzer_IIx	index	36	298734	TCCGTTCGTATGCCGTCTTCTGCTTGT	2011-05-10
GSE29173	GSM715525	SRR191415	Illumina_Genome_Analyzer_IIx	index	36	349234	TCATCTCGTATGCCGTCTTCTGCTTGT	2011-05-10
GSE29173	GSM715526	SRR191416	Illumina_Genome_Analyzer_IIx	index	36	151039	TCTGATCGTATGCCGTCTTCTGCTTGT	2011-05-10
GSE29173	GSM715527	SRR191417	Illumina_Genome_Analyzer_IIx	index	36	242950	TCTAGTCGTATGCCGTCTTCTGCTTGT	2011-05-10
GSE29173	GSM715528	SRR191418	Illumina_Genome_Analyzer_IIx	index	36	144631	TTAAGTCGTATGCCGTCTTCTGCTTGT	2011-05-10
GSE29173	GSM715529	SRR191419	Illumina_Genome_Analyzer_IIx	index	36	83071	TCCTATCGTATGCCGTCTTCTGCTTGT	2011-05-10
GSE29173	GSM715530	SRR191420	Illumina_Genome_Analyzer_IIx	index	36	253710	TAGGATCGTATGCCGTCTTCTGCTTGT	2011-05-10
GSE29173	GSM715531	SRR191421	Illumina_Genome_Analyzer_IIx	index	36	154526	TATCATCGTATGCCGTCTTCTGCTTGT	2011-05-10
GSE29173	GSM715532	SRR191422	Illumina_Genome_Analyzer_IIx	index	36	377095	TAGAGTCGTATGCCGTCTTCTGCTTGT	2011-05-10
GSE29173	GSM715533	SRR191423	Illumina_Genome_Analyzer_IIx	index	36	146540	TAACGTCGTATGCCGTCTTCTGCTTGT	2011-05-10
GSE29173	GSM715534	SRR191424	Illumina_Genome_Analyzer_IIx	index	36	34515	TTACATCGTATGCCGTCTTCTGCTTGT	2011-05-10
GSE29173	GSM715535	SRR191425	Illumina_Genome_Analyzer_IIx	index	36	93480	TTGGTTCGTATGCCGTCTTCTGCTTGT	2011-05-10
GSE29173	GSM715536	SRR191426	Illumina_Genome_Analyzer_IIx	index	36	135132	TCACTTCGTATGCCGTCTTCTGCTTGT	2011-05-10
GSE29173	GSM715537	SRR191427	Illumina_Genome_Analyzer_IIx	index	36	56819	TCATCTCGTATGCCGTCTTCTGCTTGT	2011-05-10
GSE29173	GSM715538	SRR191428	Illumina_Genome_Analyzer_IIx	index	36	86567	TCCACTCGTATGCCGTCTTCTGCTTGT	2011-05-10
GSE29173	GSM715539	SRR191429	Illumina_Genome_Analyzer_IIx	index	36	112741	TCTGATCGTATGCCGTCTTCTGCTTGT	2011-05-10
GSE29173	GSM715540	SRR191430	Illumina_Genome_Analyzer_IIx	index	36	129472	TCTCCTCGTATGCCGTCTTCTGCTTGT	2011-05-10
GSE29173	GSM715541	SRR191431	Illumina_Genome_Analyzer_IIx	index	36	96887	TCCTATCGTATGCCGTCTTCTGCTTGT	2011-05-10
GSE29173	GSM715542	SRR191432	Illumina_Genome_Analyzer_IIx	index	36	166296	TCGATTCGTATGCCGTCTTCTGCTTGT	2011-05-10
GSE29173	GSM715543	SRR191433	Illumina_Genome_Analyzer_IIx	index	36	86017	TCGCGTCGTATGCCGTCTTCTGCTTGT	2011-05-10
GSE29173	GSM715544	SRR191434	Illumina_Genome_Analyzer_IIx	index	36	601204	TTCCGTCGTATGCCGTCTTCTGCTTGT	2011-05-10
GSE29173	GSM715545	SRR191435	Illumina_Genome_Analyzer_IIx	index	36	79230	TCTAGTCGTATGCCGTCTTCTGCTTGT	2011-05-10
GSE29173	GSM715546	SRR191436	Illumina_Genome_Analyzer_IIx	index	36	142247	TCTCCTCGTATGCCGTCTTCTGCTTGT	2011-05-10
GSE29173	GSM715547	SRR191437	Illumina_Genome_Analyzer_IIx	index	36	20839	TGATGTCGTATGCCGTCTTCTGCTTGT	2011-05-10
GSE29173	GSM715548	SRR191438	Illumina_Genome_Analyzer_IIx	index	36	254550	TCTAGTCGTATGCCGTCTTCTGCTTGT	2011-05-10
GSE29173	GSM715549	SRR191439	Illumina_Genome_Analyzer_IIx	index	36	85579	TTAAGTCGTATGCCGTCTTCTGCTTGT	2011-05-10
GSE29173	GSM715550	SRR191440	Illumina_Genome_Analyzer_IIx	index	36	32124	TAATATCGTATGCCGTCTTCTGCTTGT	2011-05-10
GSE29173	GSM715551	SRR191441	Illumina_Genome_Analyzer_IIx	index	36	48547	TCGCGTCGTATGCCGTCTTCTGCTTGT	2011-05-10
GSE29173	GSM715552	SRR191442	Illumina_Genome_Analyzer_IIx	index	36	117235	TCTAGTCGTATGCCGTCTTCTGCTTGT	2011-05-10
GSE29173	GSM715553	SRR191443	Illumina_Genome_Analyzer_IIx	index	36	110029	TCTCCTCGTATGCCGTCTTCTGCTTGT	2011-05-10
GSE29173	GSM715554	SRR191444	Illumina_Genome_Analyzer_IIx	index	36	142695	TCTGATCGTATGCCGTCTTCTGCTTGT	2011-05-10
GSE29173	GSM715555	SRR191445	Illumina_Genome_Analyzer_IIx	index	36	142829	TTAAGTCGTATGCCGTCTTCTGCTTGT	2011-05-10
GSE29173	GSM715556	SRR191446	Illumina_Genome_Analyzer_IIx	index	36	37752	TGATGTCGTATGCCGTCTTCTGCTTGT	2011-05-10
GSE29173	GSM715557	SRR191447	Illumina_Genome_Analyzer_IIx	index	36	151621	TAGAGTCGTATGCCGTCTTCTGCTTGT	2011-05-10
GSE29173	GSM715558	SRR191448	Illumina_Genome_Analyzer_IIx	index	36	71262	TATCATCGTATGCCGTCTTCTGCTTGT	2011-05-10
GSE29173	GSM715559	SRR191449	Illumina_Genome_Analyzer_IIx	index	36	190065	TGTGTTCGTATGCCGTCTTCTGCTTGT	2011-05-10
GSE29173	GSM715560	SRR191450	Illumina_Genome_Analyzer_IIx	index	36	36572	TAGGATCGTATGCCGTCTTCTGCTTGT	2011-05-10
GSE29173	GSM715561	SRR191451	Illumina_Genome_Analyzer_IIx	index	36	110791	TCACTTCGTATGCCGTCTTCTGCTTGT	2011-05-10
GSE29173	GSM715562	SRR191452	Illumina_Genome_Analyzer_IIx	index	36	60383	TCATCTCGTATGCCGTCTTCTGCTTGT	2011-05-10
GSE29173	GSM715563	SRR191453	Illumina_Genome_Analyzer_IIx	index	36	70475	TCCACTCGTATGCCGTCTTCTGCTTGT	2011-05-10
GSE29173	GSM715564	SRR191454	Illumina_Genome_Analyzer_IIx	index	36	106522	TCCGTTCGTATGCCGTCTTCTGCTTGT	2011-05-10
GSE29173	GSM715565	SRR191455	Illumina_Genome_Analyzer_IIx	index	36	97135	TCCTATCGTATGCCGTCTTCTGCTTGT	2011-05-10
GSE29173	GSM715566	SRR191456	Illumina_Genome_Analyzer_IIx	index	36	161868	TCGATTCGTATGCCGTCTTCTGCTTGT	2011-05-10
GSE29173	GSM715567	SRR191457	Illumina_Genome_Analyzer_IIx	index	36	47611	TAATATCGTATGCCGTCTTCTGCTTGT	2011-05-10
GSE29173	GSM715568	SRR191458	Illumina_Genome_Analyzer_IIx	index	36	88925	TAACGTCGTATGCCGTCTTCTGCTTGT	2011-05-10
GSE29173	GSM715569	SRR191459	Illumina_Genome_Analyzer_IIx	index	36	233145	TTGGTTCGTATGCCGTCTTCTGCTTGT	2011-05-10
GSE29173	GSM715570	SRR191460	Illumina_Genome_Analyzer_IIx	index	36	235845	TTACATCGTATGCCGTCTTCTGCTTGT	2011-05-10
GSE29173	GSM715571	SRR191461	Illumina_Genome_Analyzer_IIx	index	36	153854	TTCCGTCGTATGCCGTCTTCTGCTTGT	2011-05-10
GSE29173	GSM715572	SRR191462	Illumina_Genome_Analyzer_IIx	index	36	57997	TGATGTCGTATGCCGTCTTCTGCTTGT	2011-05-10
GSE29173	GSM715573	SRR191463	Illumina_Genome_Analyzer_IIx	index	36	63378	TCACTTCGTATGCCGTCTTCTGCTTGT	2011-05-10
GSE29173	GSM715574	SRR191464	Illumina_Genome_Analyzer_IIx	index	36	101482	TCATCTCGTATGCCGTCTTCTGCTTGT	2011-05-10
GSE29173	GSM715575	SRR191465	Illumina_Genome_Analyzer_IIx	index	36	62470	TCCACTCGTATGCCGTCTTCTGCTTGT	2011-05-10
GSE29173	GSM715576	SRR191466	Illumina_Genome_Analyzer_IIx	index	36	86991	TCCGTTCGTATGCCGTCTTCTGCTTGT	2011-05-10
GSE29173	GSM715577	SRR191467	Illumina_Genome_Analyzer_IIx	index	36	45636	TCCTATCGTATGCCGTCTTCTGCTTGT	2011-05-10
GSE29173	GSM715578	SRR191468	Illumina_Genome_Analyzer_IIx	index	36	52002	TCGATTCGTATGCCGTCTTCTGCTTGT	2011-05-10
GSE29173	GSM715579	SRR191469	Illumina_Genome_Analyzer_IIx	index	36	91555	TCGCGTCGTATGCCGTCTTCTGCTTGT	2011-05-10
GSE29173	GSM715580	SRR191470	Illumina_Genome_Analyzer_IIx	index	36	52047	TCTAGTCGTATGCCGTCTTCTGCTTGT	2011-05-10
GSE29173	GSM715581	SRR191471	Illumina_Genome_Analyzer_IIx	index	36	79732	TCTCCTCGTATGCCGTCTTCTGCTTGT	2011-05-10
GSE29173	GSM715582	SRR191472	Illumina_Genome_Analyzer_IIx	index	36	49511	TCTGATCGTATGCCGTCTTCTGCTTGT	2011-05-10
GSE29173	GSM715583	SRR191473	Illumina_Genome_Analyzer_IIx	index	36	180371	TTAAGTCGTATGCCGTCTTCTGCTTGT	2011-05-10
GSE29173	GSM715584	SRR191474	Illumina_Genome_Analyzer_IIx	index	36	82995	TCCGTTCGTATGCCGTCTTCTGCTTGT	2011-05-10
GSE29173	GSM715585	SRR191475	Illumina_Genome_Analyzer_IIx	index	36	84406	TCGCGTCGTATGCCGTCTTCTGCTTGT	2011-05-10
GSE29173	GSM715586	SRR191476	Illumina_Genome_Analyzer_IIx	index	36	40001	TAGAGTCGTATGCCGTCTTCTGCTTGT	2011-05-10
GSE29173	GSM715587	SRR191477	Illumina_Genome_Analyzer_IIx	index	36	120160	TTACATCGTATGCCGTCTTCTGCTTGT	2011-05-10
GSE29173	GSM715588	SRR191478	Illumina_Genome_Analyzer_IIx	index	36	84435	TAACGTCGTATGCCGTCTTCTGCTTGT	2011-05-10
GSE29173	GSM715589	SRR191479	Illumina_Genome_Analyzer_IIx	index	36	114525	TAATATCGTATGCCGTCTTCTGCTTGT	2011-05-10
GSE29173	GSM715590	SRR191480	Illumina_Genome_Analyzer_IIx	index	36	64572	TAGGATCGTATGCCGTCTTCTGCTTGT	2011-05-10
GSE29173	GSM715591	SRR191481	Illumina_Genome_Analyzer_IIx	index	36	137508	TATCATCGTATGCCGTCTTCTGCTTGT	2011-05-10
GSE29173	GSM715592	SRR191482	Illumina_Genome_Analyzer_IIx	index	36	232128	TCGATTCGTATGCCGTCTTCTGCTTGT	2011-05-10
GSE29173	GSM715593	SRR191483	Illumina_Genome_Analyzer_IIx	index	36	84988	TTGGTTCGTATGCCGTCTTCTGCTTGT	2011-05-10
GSE29173	GSM715594	SRR191484	Illumina_Genome_Analyzer_IIx	index	36	16623	TTCCGTCGTATGCCGTCTTCTGCTTGT	2011-05-10
GSE29173	GSM715595	SRR191485	Illumina_Genome_Analyzer_IIx	index	36	182158	TCACTTCGTATGCCGTCTTCTGCTTGT	2011-05-10
GSE29173	GSM715596	SRR191486	Illumina_Genome_Analyzer_IIx	index	36	81809	TCATCTCGTATGCCGTCTTCTGCTTGT	2011-05-10
GSE29173	GSM715597	SRR191487	Illumina_Genome_Analyzer_IIx	index	36	58870	TCCACTCGTATGCCGTCTTCTGCTTGT	2011-05-10
GSE29173	GSM715598	SRR191488	Illumina_Genome_Analyzer_IIx	index	36	45008	TAGAGTCGTATGCCGTCTTCTGCTTGT	2011-05-10
GSE29173	GSM715599	SRR191489	Illumina_Genome_Analyzer_IIx	index	36	47744	TCCGTTCGTATGCCGTCTTCTGCTTGT	2011-05-10
GSE29173	GSM715600	SRR191490	Illumina_Genome_Analyzer_IIx	index	36	14356	TGTGTTCGTATGCCGTCTTCTGCTTGT	2011-05-10
GSE29173	GSM715601	SRR191491	Illumina_Genome_Analyzer_IIx	index	36	51388	TCCTATCGTATGCCGTCTTCTGCTTGT	2011-05-10
GSE29173	GSM715602	SRR191492	Illumina_Genome_Analyzer_IIx	index	36	67246	TCGCGTCGTATGCCGTCTTCTGCTTGT	2011-05-10
GSE29173	GSM715603	SRR191493	Illumina_Genome_Analyzer_IIx	index	36	33875	TCTAGTCGTATGCCGTCTTCTGCTTGT	2011-05-10
GSE29173	GSM715604	SRR191494	Illumina_Genome_Analyzer_IIx	index	36	54910	TCTCCTCGTATGCCGTCTTCTGCTTGT	2011-05-10
GSE29173	GSM715605	SRR191495	Illumina_Genome_Analyzer_IIx	index	36	71832	TCTGATCGTATGCCGTCTTCTGCTTGT	2011-05-10
GSE29173	GSM715606	SRR191496	Illumina_Genome_Analyzer_IIx	index	36	11618	TTAAGTCGTATGCCGTCTTCTGCTTGT	2011-05-10
GSE29173	GSM715607	SRR191497	Illumina_Genome_Analyzer_IIx	index	36	146615	TAATATCGTATGCCGTCTTCTGCTTGT	2011-05-10
GSE29173	GSM715608	SRR191498	Illumina_Genome_Analyzer_IIx	index	36	49914	TATCATCGTATGCCGTCTTCTGCTTGT	2011-05-10
GSE29173	GSM715609	SRR191499	Illumina_Genome_Analyzer_IIx	index	36	112917	TAGGATCGTATGCCGTCTTCTGCTTGT	2011-05-10
GSE29173	GSM715610	SRR191500	Illumina_Genome_Analyzer_IIx	index	36	139377	TGATGTCGTATGCCGTCTTCTGCTTGT	2011-05-10
GSE29173	GSM715611	SRR191501	Illumina_Genome_Analyzer_IIx	index	36	19890	TTACATCGTATGCCGTCTTCTGCTTGT	2011-05-10
GSE29173	GSM715612	SRR191502	Illumina_Genome_Analyzer_IIx	index	36	84453	TCCTATCGTATGCCGTCTTCTGCTTGT	2011-05-10
GSE29173	GSM715613	SRR191503	Illumina_Genome_Analyzer_IIx	index	36	25529	TAACGTCGTATGCCGTCTTCTGCTTGT	2011-05-10
GSE29173	GSM715614	SRR191504	Illumina_Genome_Analyzer_IIx	index	36	41493	TTAAGTCGTATGCCGTCTTCTGCTTGT	2011-05-10
GSE29173	GSM715615	SRR191505	Illumina_Genome_Analyzer_IIx	index	36	44799	TCGCGTCGTATGCCGTCTTCTGCTTGT	2011-05-10
GSE29173	GSM715616	SRR191506	Illumina_Genome_Analyzer_IIx	index	36	25514	TCTAGTCGTATGCCGTCTTCTGCTTGT	2011-05-10
GSE29173	GSM715617	SRR191507	Illumina_Genome_Analyzer_IIx	index	36	11114	TTAAGTCGTATGCCGTCTTCTGCTTGT	2011-05-10
GSE29173	GSM715618	SRR191508	Illumina_Genome_Analyzer_IIx	index	36	61315	TCGATTCGTATGCCGTCTTCTGCTTGT	2011-05-10
GSE29173	GSM715619	SRR191509	Illumina_Genome_Analyzer_IIx	index	36	68823	TCCACTCGTATGCCGTCTTCTGCTTGT	2011-05-10
GSE29173	GSM715620	SRR191510	Illumina_Genome_Analyzer_IIx	index	36	48626	TCCGTTCGTATGCCGTCTTCTGCTTGT	2011-05-10
GSE29173	GSM715621	SRR191511	Illumina_Genome_Analyzer_IIx	index	36	19258	TCCTATCGTATGCCGTCTTCTGCTTGT	2011-05-10
GSE29173	GSM715622	SRR191512	Illumina_Genome_Analyzer_IIx	index	36	14362	TCTCCTCGTATGCCGTCTTCTGCTTGT	2011-05-10
GSE29173	GSM715623	SRR191513	Illumina_Genome_Analyzer_IIx	index	36	11870	TCACTTCGTATGCCGTCTTCTGCTTGT	2011-05-10
GSE29173	GSM715624	SRR191514	Illumina_Genome_Analyzer_IIx	index	36	36658	TCATCTCGTATGCCGTCTTCTGCTTGT	2011-05-10
GSE29173	GSM715625	SRR191515	Illumina_Genome_Analyzer_IIx	index	36	33279	TAATATCGTATGCCGTCTTCTGCTTGT	2011-05-10
GSE29173	GSM715626	SRR191516	Illumina_Genome_Analyzer_IIx	index	36	23095	TGTGTTCGTATGCCGTCTTCTGCTTGT	2011-05-10
GSE29173	GSM715627	SRR191517	Illumina_Genome_Analyzer_IIx	index	36	126803	TTCCGTCGTATGCCGTCTTCTGCTTGT	2011-05-10
GSE29173	GSM715628	SRR191518	Illumina_Genome_Analyzer_IIx	index	36	76482	TTACATCGTATGCCGTCTTCTGCTTGT	2011-05-10
GSE29173	GSM715629	SRR191519	Illumina_Genome_Analyzer_IIx	index	36	92624	TATCATCGTATGCCGTCTTCTGCTTGT	2011-05-10
GSE29173	GSM715630	SRR191520	Illumina_Genome_Analyzer_IIx	index	36	28338	TGATGTCGTATGCCGTCTTCTGCTTGT	2011-05-10
GSE29173	GSM715631	SRR191521	Illumina_Genome_Analyzer_IIx	index	36	80467	TAGGATCGTATGCCGTCTTCTGCTTGT	2011-05-10
GSE29173	GSM715632	SRR191522	Illumina_Genome_Analyzer_IIx	index	36	71025	TTGGTTCGTATGCCGTCTTCTGCTTGT	2011-05-10
GSE29173	GSM715633	SRR191523	Illumina_Genome_Analyzer_IIx	index	36	36979	TTACATCGTATGCCGTCTTCTGCTTGT	2011-05-10
GSE29173	GSM715634	SRR191524	Illumina_Genome_Analyzer_IIx	index	36	29915	TTCCGTCGTATGCCGTCTTCTGCTTGT	2011-05-10
GSE29173	GSM715635	SRR191525	Illumina_Genome_Analyzer_IIx	index	36	26730	TTGGTTCGTATGCCGTCTTCTGCTTGT	2011-05-10
GSE29173	GSM715636	SRR191526	Illumina_Genome_Analyzer_IIx	index	36	33065	TCATCTCGTATGCCGTCTTCTGCTTGT	2011-05-10
GSE29173	GSM715637	SRR191527	Illumina_Genome_Analyzer_IIx	index	36	36574	TCTAGTCGTATGCCGTCTTCTGCTTGT	2011-05-10
GSE29173	GSM715638	SRR191528	Illumina_Genome_Analyzer_IIx	index	36	31481	TCTCCTCGTATGCCGTCTTCTGCTTGT	2011-05-10
GSE29173	GSM715639	SRR191529	Illumina_Genome_Analyzer_IIx	index	36	11730	TCCACTCGTATGCCGTCTTCTGCTTGT	2011-05-10
GSE29173	GSM715640	SRR191530	Illumina_Genome_Analyzer_IIx	index	36	37655	TCCGTTCGTATGCCGTCTTCTGCTTGT	2011-05-10
GSE29173	GSM715641	SRR191531	Illumina_Genome_Analyzer_IIx	index	36	37237	TTAAGTCGTATGCCGTCTTCTGCTTGT	2011-05-10
GSE29173	GSM715642	SRR191532	Illumina_Genome_Analyzer_IIx	index	36	19184	TCCTATCGTATGCCGTCTTCTGCTTGT	2011-05-10
GSE29173	GSM715643	SRR191533	Illumina_Genome_Analyzer_IIx	index	36	11464	TCGATTCGTATGCCGTCTTCTGCTTGT	2011-05-10
GSE29173	GSM715644	SRR191534	Illumina_Genome_Analyzer_IIx	index	36	16056	TGATGTCGTATGCCGTCTTCTGCTTGT	2011-05-10
GSE29173	GSM715645	SRR191535	Illumina_Genome_Analyzer_IIx	index	36	29732	TGTGTTCGTATGCCGTCTTCTGCTTGT	2011-05-10
GSE29173	GSM715646	SRR191536	Illumina_Genome_Analyzer_IIx	index	36	27383	TCGCGTCGTATGCCGTCTTCTGCTTGT	2011-05-10
GSE29173	GSM715647	SRR191537	Illumina_Genome_Analyzer_IIx	index	36	33835	TAGGATCGTATGCCGTCTTCTGCTTGT	2011-05-10
GSE29173	GSM715648	SRR191538	Illumina_Genome_Analyzer_IIx	index	36	53972	TAATATCGTATGCCGTCTTCTGCTTGT	2011-05-10
GSE29173	GSM715649	SRR191539	Illumina_Genome_Analyzer_IIx	index	36	33567	TATCATCGTATGCCGTCTTCTGCTTGT	2011-05-10
GSE29173	GSM715650	SRR191540	Illumina_Genome_Analyzer_IIx	index	36	44339	TAACGTCGTATGCCGTCTTCTGCTTGT	2011-05-10
GSE29173	GSM715651	SRR191541	Illumina_Genome_Analyzer_IIx	index	36	62735	TAGAGTCGTATGCCGTCTTCTGCTTGT	2011-05-10
GSE29173	GSM715652	SRR191542	Illumina_Genome_Analyzer_IIx	index	36	49715	TCTGATCGTATGCCGTCTTCTGCTTGT	2011-05-10
GSE29173	GSM715653	SRR191543	Illumina_Genome_Analyzer_IIx	index	36	55765	TATCATCGTATGCCGTCTTCTGCTTGT	2011-05-10
GSE29173	GSM715654	SRR191544	Illumina_Genome_Analyzer_IIx	index	36	44656	TAACGTCGTATGCCGTCTTCTGCTTGT	2011-05-10
GSE29173	GSM715655	SRR191545	Illumina_Genome_Analyzer_IIx	index	36	60819	TAGGATCGTATGCCGTCTTCTGCTTGT	2011-05-10
GSE29173	GSM715656	SRR191546	Illumina_Genome_Analyzer_IIx	index	36	67145	TAGAGTCGTATGCCGTCTTCTGCTTGT	2011-05-10
GSE29173	GSM715657	SRR191547	Illumina_Genome_Analyzer_IIx	index	36	103059	TAATATCGTATGCCGTCTTCTGCTTGT	2011-05-10
GSE29173	GSM715658	SRR191548	Illumina_Genome_Analyzer_IIx	index	36	880564	TCGATTCGTATGCCGTCTTCTGCTTGT	2011-05-10
GSE29173	GSM715659	SRR191549	Illumina_Genome_Analyzer_IIx	index	36	288539	TCGCGTCGTATGCCGTCTTCTGCTTGT	2011-05-10
GSE29173	GSM715660	SRR191550	Illumina_Genome_Analyzer_IIx	index	36	333772	TCACTTCGTATGCCGTCTTCTGCTTGT	2011-05-10
GSE29173	GSM715661	SRR191551	Illumina_Genome_Analyzer_IIx	index	36	626110	TCCACTCGTATGCCGTCTTCTGCTTGT	2011-05-10
GSE29173	GSM715662	SRR191552	Illumina_Genome_Analyzer_IIx	index	36	385594	TCATCTCGTATGCCGTCTTCTGCTTGT	2011-05-10
GSE29173	GSM715663	SRR191553	Illumina_Genome_Analyzer_IIx	index	36	165608	TCCGTTCGTATGCCGTCTTCTGCTTGT	2011-05-10
GSE29173	GSM715664	SRR191554	Illumina_Genome_Analyzer_IIx	index	36	436890	TCCTATCGTATGCCGTCTTCTGCTTGT	2011-05-10
GSE29173	GSM715665	SRR191555	Illumina_Genome_Analyzer_IIx	index	36	61883	TCACTTCGTATGCCGTCTTCTGCTTGT	2011-05-10
GSE29173	GSM715666	SRR191556	Illumina_Genome_Analyzer_IIx	index	36	334117	TCCTATCGTATGCCGTCTTCTGCTTGT	2011-05-10
GSE29173	GSM715667	SRR191557	Illumina_Genome_Analyzer_IIx	index	36	402667	TCGCGTCGTATGCCGTCTTCTGCTTGT	2011-05-10
GSE29173	GSM715668	SRR191558	Illumina_Genome_Analyzer_IIx	index	36	311502	TCACTTCGTATGCCGTCTTCTGCTTGT	2011-05-10
GSE29173	GSM715669	SRR191559	Illumina_Genome_Analyzer_IIx	index	36	481250	TCCGTTCGTATGCCGTCTTCTGCTTGT	2011-05-10
GSE29173	GSM715670	SRR191560	Illumina_Genome_Analyzer_IIx	index	36	278708	TCTCCTCGTATGCCGTCTTCTGCTTGT	2011-05-10
GSE29173	GSM715671	SRR191561	Illumina_Genome_Analyzer_IIx	index	36	42272	TCCACTCGTATGCCGTCTTCTGCTTGT	2011-05-10
GSE29173	GSM715672	SRR191562	Illumina_Genome_Analyzer_IIx	index	36	176732	TTAAGTCGTATGCCGTCTTCTGCTTGT	2011-05-10
GSE29173	GSM715673	SRR191563	Illumina_Genome_Analyzer_IIx	index	36	415815	TCATCTCGTATGCCGTCTTCTGCTTGT	2011-05-10
GSE29173	GSM715674	SRR191564	Illumina_Genome_Analyzer_IIx	index	36	499064	TCGATTCGTATGCCGTCTTCTGCTTGT	2011-05-10
GSE29173	GSM715675	SRR191565	Illumina_Genome_Analyzer_IIx	index	36	462205	TCTGATCGTATGCCGTCTTCTGCTTGT	2011-05-10
GSE29173	GSM715676	SRR191566	Illumina_Genome_Analyzer_IIx	index	36	644233	TCTAGTCGTATGCCGTCTTCTGCTTGT	2011-05-10
GSE29173	GSM715677	SRR191567	Illumina_Genome_Analyzer_IIx	index	36	90338	TCGCGTCGTATGCCGTCTTCTGCTTGT	2011-05-10
GSE29173	GSM715678	SRR191568	Illumina_Genome_Analyzer_IIx	index	36	342227	TCACTTCGTATGCCGTCTTCTGCTTGT	2011-05-10
GSE29173	GSM715679	SRR191569	Illumina_Genome_Analyzer_IIx	index	36	132170	TTAAGTCGTATGCCGTCTTCTGCTTGT	2011-05-10
GSE29173	GSM715680	SRR191570	Illumina_Genome_Analyzer_IIx	index	36	242219	TCTGATCGTATGCCGTCTTCTGCTTGT	2011-05-10
GSE29173	GSM715681	SRR191571	Illumina_Genome_Analyzer_IIx	index	36	281578	TCCACTCGTATGCCGTCTTCTGCTTGT	2011-05-10
GSE29173	GSM715682	SRR191572	Illumina_Genome_Analyzer_IIx	index	36	66046	TCTCCTCGTATGCCGTCTTCTGCTTGT	2011-05-10
GSE29173	GSM715683	SRR191573	Illumina_Genome_Analyzer_IIx	index	36	265555	TCCTATCGTATGCCGTCTTCTGCTTGT	2011-05-10
GSE29173	GSM715684	SRR191574	Illumina_Genome_Analyzer_IIx	index	36	125409	TCTAGTCGTATGCCGTCTTCTGCTTGT	2011-05-10
GSE29173	GSM715685	SRR191575	Illumina_Genome_Analyzer_IIx	index	36	171668	TCCGTTCGTATGCCGTCTTCTGCTTGT	2011-05-10
GSE29173	GSM715686	SRR191576	Illumina_Genome_Analyzer_IIx	index	36	229864	TCGATTCGTATGCCGTCTTCTGCTTGT	2011-05-10
GSE29173	GSM715687	SRR191577	Illumina_Genome_Analyzer_IIx	index	36	194468	TCATCTCGTATGCCGTCTTCTGCTTGT	2011-05-10
GSE29173	GSM715688	SRR191578	Illumina_Genome_Analyzer_IIx	index	36	500705	TCCACTCGTATGCCGTCTTCTGCTTGT	2011-05-10
GSE29173	GSM715689	SRR191579	Illumina_Genome_Analyzer_IIx	index	36	86899	TCGCGTCGTATGCCGTCTTCTGCTTGT	2011-05-10
GSE29173	GSM715690	SRR191580	Illumina_Genome_Analyzer_IIx	index	36	146344	TCGATTCGTATGCCGTCTTCTGCTTGT	2011-05-10
GSE29173	GSM715691	SRR191581	Illumina_Genome_Analyzer_IIx	index	36	342815	TCATCTCGTATGCCGTCTTCTGCTTGT	2011-05-10
GSE29173	GSM715692	SRR191582	Illumina_Genome_Analyzer_IIx	index	36	283125	TCCGTTCGTATGCCGTCTTCTGCTTGT	2011-05-10
GSE29173	GSM715693	SRR191583	Illumina_Genome_Analyzer_IIx	index	36	14367	TCACTTCGTATGCCGTCTTCTGCTTGT	2011-05-10
GSE29173	GSM715694	SRR191584	Illumina_Genome_Analyzer_IIx	index	36	60644	TCCTATCGTATGCCGTCTTCTGCTTGT	2011-05-10
GSE29173	GSM715695	SRR191585	Illumina_Genome_Analyzer_IIx	index	36	620488	TCTAGTCGTATGCCGTCTTCTGCTTGT	2011-05-10
GSE29173	GSM715696	SRR191586	Illumina_Genome_Analyzer_IIx	index	36	228541	TCGATTCGTATGCCGTCTTCTGCTTGT	2011-05-10
GSE29173	GSM715697	SRR191587	Illumina_Genome_Analyzer_IIx	index	36	428519	TTAAGTCGTATGCCGTCTTCTGCTTGT	2011-05-10
GSE29173	GSM715698	SRR191588	Illumina_Genome_Analyzer_IIx	index	36	488397	TCTGATCGTATGCCGTCTTCTGCTTGT	2011-05-10
GSE29173	GSM715699	SRR191589	Illumina_Genome_Analyzer_IIx	index	36	968006	TCTCCTCGTATGCCGTCTTCTGCTTGT	2011-05-10
GSE29173	GSM715700	SRR191590	Illumina_Genome_Analyzer_IIx	index	36	1460523	TCTAGTCGTATGCCGTCTTCTGCTTGT	2011-05-10
GSE29173	GSM715701	SRR191591	Illumina_Genome_Analyzer_IIx	index	36	854303	TCGCGTCGTATGCCGTCTTCTGCTTGT	2011-05-10
GSE29173	GSM715702	SRR191592	Illumina_Genome_Analyzer_IIx	index	36	677397	TCGATTCGTATGCCGTCTTCTGCTTGT	2011-05-10
GSE29173	GSM715703	SRR191593	Illumina_Genome_Analyzer_IIx	index	36	719420	TCATCTCGTATGCCGTCTTCTGCTTGT	2011-05-10
GSE29173	GSM715704	SRR191594	Illumina_Genome_Analyzer_IIx	index	36	381384	TCCACTCGTATGCCGTCTTCTGCTTGT	2011-05-10
GSE29173	GSM715705	SRR191595	Illumina_Genome_Analyzer_IIx	index	36	449151	TCTGATCGTATGCCGTCTTCTGCTTGT	2011-05-10
GSE29173	GSM715706	SRR191596	Illumina_Genome_Analyzer_IIx	index	36	291455	TTAAGTCGTATGCCGTCTTCTGCTTGT	2011-05-10
GSE29173	GSM715707	SRR191597	Illumina_Genome_Analyzer_IIx	index	36	1121035	TCCTATCGTATGCCGTCTTCTGCTTGT	2011-05-10
GSE29173	GSM715708	SRR191598	Illumina_Genome_Analyzer_IIx	index	36	831719	TCTCCTCGTATGCCGTCTTCTGCTTGT	2011-05-10
GSE29173	GSM715709	SRR191599	Illumina_Genome_Analyzer_IIx	index	36	365983	TCACTTCGTATGCCGTCTTCTGCTTGT	2011-05-10
GSE29173	GSM715710	SRR191600	Illumina_Genome_Analyzer_IIx	index	36	644759	TCCGTTCGTATGCCGTCTTCTGCTTGT	2011-05-10
GSE29173	GSM715711	SRR191601	Illumina_Genome_Analyzer_IIx	index	36	834516	TCATCTCGTATGCCGTCTTCTGCTTGT	2011-05-10
GSE29173	GSM715712	SRR191602	Illumina_Genome_Analyzer_IIx	index	36	1631075	TCCACTCGTATGCCGTCTTCTGCTTGT	2011-05-10
GSE29173	GSM715713	SRR191603	Illumina_Genome_Analyzer_IIx	index	36	1191991	TCCGTTCGTATGCCGTCTTCTGCTTGT	2011-05-10
GSE29173	GSM715714	SRR191604	Illumina_Genome_Analyzer_IIx	index	36	1203352	TCACTTCGTATGCCGTCTTCTGCTTGT	2011-05-10
GSE29173	GSM715715	SRR191605	Illumina_Genome_Analyzer_IIx	index	36	1472658	TCCTATCGTATGCCGTCTTCTGCTTGT	2011-05-10
GSE29173	GSM715716	SRR191606	Illumina_Genome_Analyzer_IIx	index	36	444839	TCGATTCGTATGCCGTCTTCTGCTTGT	2011-05-10
GSE29173	GSM715717	SRR191607	Illumina_Genome_Analyzer_IIx	index	36	1025054	TCGATTCGTATGCCGTCTTCTGCTTGT	2011-05-10
GSE29173	GSM715718	SRR191608	Illumina_Genome_Analyzer_IIx	index	36	270241	TCCTATCGTATGCCGTCTTCTGCTTGT	2011-05-10
GSE29173	GSM715719	SRR191609	Illumina_Genome_Analyzer_IIx	index	36	154862	TCCGTTCGTATGCCGTCTTCTGCTTGT	2011-05-10
GSE29173	GSM715720	SRR191610	Illumina_Genome_Analyzer_IIx	index	36	254211	TCTCCTCGTATGCCGTCTTCTGCTTGT	2011-05-10
GSE29173	GSM715721	SRR191611	Illumina_Genome_Analyzer_IIx	index	36	472752	TGATGTCGTATGCCGTCTTCTGCTTGT	2011-05-10
GSE29173	GSM715722	SRR191612	Illumina_Genome_Analyzer_IIx	index	36	569882	TGTGTTCGTATGCCGTCTTCTGCTTGT	2011-05-10
GSE29173	GSM715723	SRR191613	Illumina_Genome_Analyzer_IIx	index	36	183711	TTACATCGTATGCCGTCTTCTGCTTGT	2011-05-10
GSE29173	GSM715724	SRR191614	Illumina_Genome_Analyzer_IIx	index	36	573043	TTGGTTCGTATGCCGTCTTCTGCTTGT	2011-05-10
GSE29173	GSM715725	SRR191615	Illumina_Genome_Analyzer_IIx	index	36	1021848	TATCATCGTATGCCGTCTTCTGCTTGT	2011-05-10
GSE29173	GSM715726	SRR191616	Illumina_Genome_Analyzer_IIx	index	36	54259	TCATCTCGTATGCCGTCTTCTGCTTGT	2011-05-10
GSE29173	GSM715727	SRR191617	Illumina_Genome_Analyzer_IIx	index	36	388816	TCCACTCGTATGCCGTCTTCTGCTTGT	2011-05-10
GSE29173	GSM715728	SRR191618	Illumina_Genome_Analyzer_IIx	index	36	258424	TTAAGTCGTATGCCGTCTTCTGCTTGT	2011-05-10
GSE29173	GSM715729	SRR191619	Illumina_Genome_Analyzer_IIx	index	36	398159	TCTGATCGTATGCCGTCTTCTGCTTGT	2011-05-10
GSE29173	GSM715730	SRR191620	Illumina_Genome_Analyzer_IIx	index	36	680886	TCTCCTCGTATGCCGTCTTCTGCTTGT	2011-05-10
GSE29173	GSM715731	SRR191621	Illumina_Genome_Analyzer_IIx	index	36	840334	TCCGTTCGTATGCCGTCTTCTGCTTGT	2011-05-10
GSE29173	GSM715732	SRR191622	Illumina_Genome_Analyzer_IIx	index	36	890845	TCTAGTCGTATGCCGTCTTCTGCTTGT	2011-05-10
GSE29173	GSM715733	SRR191623	Illumina_Genome_Analyzer_IIx	index	36	399791	TCGCGTCGTATGCCGTCTTCTGCTTGT	2011-05-10
GSE29173	GSM715734	SRR191624	Illumina_Genome_Analyzer_IIx	index	36	699002	TAATATCGTATGCCGTCTTCTGCTTGT	2011-05-10
GSE29173	GSM715735	SRR191625	Illumina_Genome_Analyzer_IIx	index	36	589466	TAACGTCGTATGCCGTCTTCTGCTTGT	2011-05-10
GSE29173	GSM715736	SRR191626	Illumina_Genome_Analyzer_IIx	index	36	492580	TAGAGTCGTATGCCGTCTTCTGCTTGT	2011-05-10
GSE29173	GSM715737	SRR191627	Illumina_Genome_Analyzer_IIx	index	36	643769	TGTGTTCGTATGCCGTCTTCTGCTTGT	2011-05-10
GSE29173	GSM715738	SRR191628	Illumina_Genome_Analyzer_IIx	index	36	413229	TGATGTCGTATGCCGTCTTCTGCTTGT	2011-05-10
GSE29173	GSM715739	SRR191629	Illumina_Genome_Analyzer_IIx	index	36	1046694	TCGATTCGTATGCCGTCTTCTGCTTGT	2011-05-10
GSE29173	GSM715740	SRR191630	Illumina_Genome_Analyzer_IIx	index	36	438251	TTACATCGTATGCCGTCTTCTGCTTGT	2011-05-10
GSE29173	GSM715741	SRR191631	Illumina_Genome_Analyzer_IIx	index	36	1340601	TTGGTTCGTATGCCGTCTTCTGCTTGT	2011-05-10
GSE29173	GSM715742	SRR191632	Illumina_Genome_Analyzer_IIx	index	36	533898	TATCATCGTATGCCGTCTTCTGCTTGT	2011-05-10
GSE29173	GSM715743	SRR191633	Illumina_Genome_Analyzer_IIx	index	36	571793	TAGGATCGTATGCCGTCTTCTGCTTGT	2011-05-10
GSE29173	GSM715744	SRR191634	Illumina_Genome_Analyzer_IIx	index	36	28542	TCACTTCGTATGCCGTCTTCTGCTTGT	2011-05-10
GSE29173	GSM715745	SRR191635	Illumina_Genome_Analyzer_IIx	index	36	552937	TCCTATCGTATGCCGTCTTCTGCTTGT	2011-05-10
GSE29173	GSM715746	SRR191636	Illumina_Genome_Analyzer_IIx	index	36	35952	TTACATCGTATGCCGTCTTCTGCTTGT	2011-05-10
GSE29173	GSM715747	SRR191637	Illumina_Genome_Analyzer_IIx	index	36	8510	TTGGTTCGTATGCCGTCTTCTGCTTGT	2011-05-10
GSE37616	GSM923251	SRR491337	Illumina_Genome_Analyzer_IIx	uniform	35	2359380	CGCCTTGG	2012-04-26
GSE37616	GSM923252	SRR491338	Illumina_Genome_Analyzer_IIx	uniform	35	1783565	CGCCTTGG	2012-04-26
GSE37616	GSM923253	SRR491339	Illumina_Genome_Analyzer_IIx	uniform	35	3551323	CGCCTTGG	2012-04-26
GSE37616	GSM923254	SRR491340	Illumina_Genome_Analyzer_IIx	uniform	35	2068271	CGCCTTGG	2012-04-26
GSE37616	GSM923255	SRR491341	Illumina_Genome_Analyzer_IIx	uniform	35	42357	CGCCTTGG	2012-04-26
GSE37616	GSM923256	SRR491342	Illumina_Genome_Analyzer_IIx	uniform	35	2160158	CGCCTTGG	2012-04-26
GSE37616	GSM923257	SRR491343	Illumina_Genome_Analyzer_IIx	uniform	50	386683	CGCCTTGG	2012-04-26
GSE37616	GSM923258	SRR491344	Illumina_Genome_Analyzer_IIx	uniform	50	138510	CGCCTTGG	2012-04-26
GSE37616	GSM923259	SRR491345	Illumina_Genome_Analyzer_IIx	uniform	50	507777	CGCCTTGG	2012-04-26
GSE37616	GSM923260	SRR491346	Illumina_Genome_Analyzer_IIx	uniform	50	1282817	CGCCTTGG	2012-04-26
GSE37616	GSM923261	SRR491347	Illumina_Genome_Analyzer_IIx	uniform	50	934372	CGCCTTGG	2012-04-26
GSE39162	GSM957192	SRR518946	Illumina_Genome_Analyzer_II	uniform	50	6721999	TCGTATGCCGTCTTCTGCTTG	2012-07-06
GSE39162	GSM957193	SRR518947	Illumina_Genome_Analyzer_II	uniform	42	7767446	TCGTATGCCGTCTTCTGCTTG	2012-07-06
GSE39162	GSM957194	SRR518948	Illumina_Genome_Analyzer_II	uniform	42	7480451	TCGTATGCCGTCTTCTGCTTG	2012-07-06
GSE39162	GSM957195	SRR518949	Illumina_Genome_Analyzer	uniform	44	5285756	TCGTATGCCGTCTTCTGCTTG	2012-07-06
GSE39162	GSM957196	SRR518950	Illumina_Genome_Analyzer	uniform	44	5521232	TCGTATGCCGTCTTCTGCTTG	2012-07-06
GSE39162	GSM957197	SRR518951	Illumina_Genome_Analyzer	uniform	44	5121678	TCGTATGCCGTCTTCTGCTTG	2012-07-06
GSE39162	GSM957198	SRR518952	Illumina_Genome_Analyzer_II	uniform	50	8497942	TCGTATGCCGTCTTCTGCTTG	2012-07-06
GSE39162	GSM957199	SRR518953	Illumina_Genome_Analyzer_II	uniform	50	8283887	TCGTATGCCGTCTTCTGCTTG	2012-07-06
GSE39162	GSM957200	SRR518954	Illumina_Genome_Analyzer_II	uniform	50	7726690	TCGTATGCCGTCTTCTGCTTG	2012-07-06
GSE39162	GSM957201	SRR518955	Illumina_Genome_Analyzer_II	uniform	50	6474292	TCGTATGCCGTCTTCTGCTTG	2012-07-06
GSE39162	GSM957202	SRR518956	Illumina_Genome_Analyzer_II	uniform	50	7731105	TCGTATGCCGTCTTCTGCTTG	2012-07-06
GSE39162	GSM957203	SRR518957	Illumina_Genome_Analyzer_II	uniform	50	8259907	TCGTATGCCGTCTTCTGCTTG	2012-07-06
GSE39162	GSM957204	SRR518958	Illumina_Genome_Analyzer	uniform	44	5776222	TCGTATGCCGTCTTCTGCTTG	2012-07-06
GSE39162	GSM957205	SRR518959	Illumina_Genome_Analyzer	uniform	44	5192779	TCGTATGCCGTCTTCTGCTTG	2012-07-06
GSE39162	GSM957206	SRR518960	Illumina_Genome_Analyzer	uniform	44	4429852	TCGTATGCCGTCTTCTGCTTG	2012-07-06
GSE40499	GSM995300	SRR553572	Illumina_Genome_Analyzer_IIx	uniform	37	25731998	ATCTCGTATGCCGTCTTCTGCTTG	2012-08-30
GSE40499	GSM995301	SRR553573	Illumina_Genome_Analyzer_IIx	uniform	37	26787959	ATCTCGTATGCCGTCTTCTGCTTG	2012-08-30
GSE40499	GSM995302	SRR553574	Illumina_Genome_Analyzer_IIx	uniform	37	25096969	ATCTCGTATGCCGTCTTCTGCTTG	2012-08-30
GSE40499	GSM995303	SRR553575	Illumina_Genome_Analyzer_IIx	uniform	37	25173422	ATCTCGTATGCCGTCTTCTGCTTG	2012-08-30
GSE40499	GSM995304	SRR553576	Illumina_Genome_Analyzer_IIx	uniform	37	24285403	ATCTCGTATGCCGTCTTCTGCTTG	2012-08-30
GSE40499	GSM995305	SRR553577	Illumina_Genome_Analyzer_IIx	uniform	37	35061659	ATCTCGTATGCCGTCTTCTGCTTG	2012-08-30
GSE40499	GSM995306	SRR553578	Illumina_Genome_Analyzer_IIx	uniform	37	34641556	ATCTCGTATGCCGTCTTCTGCTTG	2012-08-30
GSE40499	GSM995307	SRR553579	Illumina_Genome_Analyzer_IIx	uniform	37	38811400	ATCTCGTATGCCGTCTTCTGCTTG	2012-08-30
GSE40499	GSM995308	SRR553580	Illumina_Genome_Analyzer_IIx	uniform	37	26446011	ATCTCGTATGCCGTCTTCTGCTTG	2012-08-30
GSE40499	GSM995309	SRR553581	Illumina_Genome_Analyzer_IIx	uniform	37	29762323	ATCTCGTATGCCGTCTTCTGCTTG	2012-08-30
GSE40499	GSM995310	SRR553582	Illumina_Genome_Analyzer_IIx	uniform	37	30427250	ATCTCGTATGCCGTCTTCTGCTTG	2012-08-30
GSE40499	GSM995311	SRR553583	Illumina_Genome_Analyzer_IIx	uniform	37	31819546	ATCTCGTATGCCGTCTTCTGCTTG	2012-08-30
GSE40499	GSM995312	SRR553584	Illumina_Genome_Analyzer_IIx	uniform	37	40424132	ATCTCGTATGCCGTCTTCTGCTTG	2012-08-30
GSE40499	GSM995313	SRR553585	Illumina_Genome_Analyzer_IIx	uniform	37	26700723	ATCTCGTATGCCGTCTTCTGCTTG	2012-08-30
GSE40499	GSM995314	SRR553586	Illumina_Genome_Analyzer_IIx	uniform	37	31568655	ATCTCGTATGCCGTCTTCTGCTTG	2012-08-30
GSE40499	GSM995315	SRR553587	Illumina_Genome_Analyzer_IIx	uniform	37	30758743	ATCTCGTATGCCGTCTTCTGCTTG	2012-08-30
GSE40499	GSM995316	SRR553588	Illumina_Genome_Analyzer_IIx	uniform	37	23829140	ATCTCGTATGCCGTCTTCTGCTTG	2012-08-30
GSE40499	GSM995317	SRR553589	Illumina_Genome_Analyzer_IIx	uniform	37	30774303	ATCTCGTATGCCGTCTTCTGCTTG	2012-08-30
GSE40499	GSM995318	SRR553590	Illumina_Genome_Analyzer_IIx	uniform	37	24076398	ATCTCGTATGCCGTCTTCTGCTTG	2012-08-30
GSE40499	GSM995319	SRR553591	Illumina_Genome_Analyzer_IIx	uniform	37	30914709	ATCTCGTATGCCGTCTTCTGCTTG	2012-08-30
GSE40499	GSM995320	SRR553592	Illumina_Genome_Analyzer_IIx	uniform	37	24462249	ATCTCGTATGCCGTCTTCTGCTTG	2012-08-30
GSE40499	GSM995321	SRR553593	Illumina_Genome_Analyzer_IIx	uniform	37	30665957	ATCTCGTATGCCGTCTTCTGCTTG	2012-08-30
GSE40499	GSM995322	SRR553594	Illumina_Genome_Analyzer_IIx	uniform	37	27999776	ATCTCGTATGCCGTCTTCTGCTTG	2012-08-30
GSE40499	GSM995323	SRR553595	Illumina_Genome_Analyzer_IIx	uniform	37	25243423	ATCTCGTATGCCGTCTTCTGCTTG	2012-08-30
GSE40499	GSM995324	SRR553596	Illumina_Genome_Analyzer_IIx	uniform	37	27624562	ATCTCGTATGCCGTCTTCTGCTTG	2012-08-30
GSE40499	GSM995325	SRR553597	Illumina_Genome_Analyzer_IIx	uniform	37	25630579	ATCTCGTATGCCGTCTTCTGCTTG	2012-08-30
GSE40499	GSM995326	SRR553598	Illumina_Genome_Analyzer_IIx	uniform	37	23754727	ATCTCGTATGCCGTCTTCTGCTTG	2012-08-30
GSE40499	GSM995327	SRR553599	Illumina_Genome_Analyzer_IIx	uniform	37	34748900	ATCTCGTATGCCGTCTTCTGCTTG	2012-08-30
GSE40499	GSM995328	SRR553600	Illumina_Genome_Analyzer_IIx	uniform	37	27969550	ATCTCGTATGCCGTCTTCTGCTTG	2012-08-30
GSE40499	GSM995329	SRR553601	Illumina_Genome_Analyzer_IIx	uniform	37	34200789	ATCTCGTATGCCGTCTTCTGCTTG	2012-08-30
GSE45144	GSM1097888	SRR772115	Illumina_HiSeq_2000	uniform	49	36194585	TGGAATTCTCGTATGCCGTCTTCTGCTTG	2013-03-13
GSE45506	GSM1105748	SRR797059	Illumina_Genome_Analyzer_IIx	index	38	7888891	TACTATCGTATGCCGTCTTCTGCTTG	2013-03-29
GSE45506	GSM1105749	SRR797060	Illumina_Genome_Analyzer_IIx	index	38	4857132	TGTAATCGTATGCCGTCTTCTGCTTG	2013-03-29
GSE45506	GSM1105750	SRR797061	Illumina_Genome_Analyzer_IIx	index	38	9559876	TTACATCGTATGCCGTCTTCTGCTTG	2013-03-29
GSE45506	GSM1105751	SRR797062	Illumina_Genome_Analyzer_IIx	index	38	1053437	TATGATCGTATGCCGTCTTCTGCTTG	2013-03-29
GSE45506	GSM1105752	SRR797063	Illumina_Genome_Analyzer_IIx	index	38	644091	TGAGATCGTATGCCGTCTTCTGCTTG	2013-03-29
GSE45506	GSM1105753	SRR797064	Illumina_Genome_Analyzer_IIx	index	38	7653347	TCATATCGTATGCCGTCTTCTGCTTG	2013-03-29
GSE46224	GSM1126652	SRR831005	Illumina_HiSeq_2000	uniform	50	9132586	TGGAATTCTCGGGTGCCAAGG	2013-04-19
GSE46224	GSM1126653	SRR831006	Illumina_HiSeq_2000	uniform	50	9656629	TGGAATTCTCGGGTGCCAAGG	2013-04-19
GSE46224	GSM1126654	SRR831007	Illumina_HiSeq_2000	uniform	50	18050815	TGGAATTCTCGGGTGCCAAGG	2013-04-19
GSE46224	GSM1126655	SRR831008	Illumina_HiSeq_2000	uniform	50	18925223	TGGAATTCTCGGGTGCCAAGG	2013-04-19
GSE46224	GSM1126656	SRR831009	Illumina_HiSeq_2000	uniform	50	16229037	TGGAATTCTCGGGTGCCAAGG	2013-04-19
GSE46224	GSM1126657	SRR831010	Illumina_HiSeq_2000	uniform	50	15069025	TGGAATTCTCGGGTGCCAAGG	2013-04-19
GSE46224	GSM1126658	SRR831011	Illumina_HiSeq_2000	uniform	50	6258923	TGGAATTCTCGGGTGCCAAGG	2013-04-19
GSE46224	GSM1126659	SRR831012	Illumina_HiSeq_2000	uniform	50	8558922	TGGAATTCTCGGGTGCCAAGG	2013-04-19
GSE46224	GSM1126660	SRR831013	Illumina_HiSeq_2000	uniform	50	9643160	TGGAATTCTCGGGTGCCAAGG	2013-04-19
GSE46224	GSM1126661	SRR831014	Illumina_HiSeq_2000	uniform	50	14826316	TGGAATTCTCGGGTGCCAAGG	2013-04-19
GSE46224	GSM1126662	SRR831015	Illumina_HiSeq_2000	uniform	50	14403345	TGGAATTCTCGGGTGCCAAGG	2013-04-19
GSE46224	GSM1126663	SRR831016	Illumina_HiSeq_2000	uniform	50	11337886	TGGAATTCTCGGGTGCCAAGG	2013-04-19
GSE46224	GSM1126664	SRR831017	Illumina_HiSeq_2000	uniform	50	12028333	TGGAATTCTCGGGTGCCAAGG	2013-04-19
GSE46224	GSM1126665	SRR831018	Illumina_HiSeq_2000	uniform	50	10680561	TGGAATTCTCGGGTGCCAAGG	2013-04-19
GSE46224	GSM1126666	SRR831019	Illumina_HiSeq_2000	uniform	50	18802535	TGGAATTCTCGGGTGCCAAGG	2013-04-19
GSE46224	GSM1126667	SRR831020	Illumina_HiSeq_2000	uniform	50	16052712	TGGAATTCTCGGGTGCCAAGG	2013-04-19
GSE46224	GSM1126668	SRR831021	Illumina_HiSeq_2000	uniform	50	12515958	TGGAATTCTCGGGTGCCAAGG	2013-04-19
GSE46224	GSM1126669	SRR831022	Illumina_HiSeq_2000	uniform	50	9216445	TGGAATTCTCGGGTGCCAAGG	2013-04-19
GSE46224	GSM1126670	SRR831023	Illumina_HiSeq_2000	uniform	50	18062658	TGGAATTCTCGGGTGCCAAGG	2013-04-19
GSE46224	GSM1126671	SRR831024	Illumina_HiSeq_2000	uniform	50	15221699	TGGAATTCTCGGGTGCCAAGG	2013-04-19
GSE46224	GSM1126672	SRR831025	Illumina_HiSeq_2000	uniform	50	13991043	TGGAATTCTCGGGTGCCAAGG	2013-04-19
GSE46224	GSM1126673	SRR831026	Illumina_HiSeq_2000	uniform	50	11129805	TGGAATTCTCGGGTGCCAAGG	2013-04-19
GSE46224	GSM1126674	SRR831027	Illumina_HiSeq_2000	uniform	50	15812860	TGGAATTCTCGGGTGCCAAGG	2013-04-19
GSE46224	GSM1126675	SRR831028	Illumina_HiSeq_2000	uniform	50	12927154	TGGAATTCTCGGGTGCCAAGG	2013-04-19
GSE46224	GSM1126676	SRR831029	Illumina_HiSeq_2000	uniform	50	14477141	TGGAATTCTCGGGTGCCAAGG	2013-04-19
GSE46224	GSM1126677	SRR831030	Illumina_HiSeq_2000	uniform	50	12222152	TGGAATTCTCGGGTGCCAAGG	2013-04-19
GSE46224	GSM1126678	SRR831031	Illumina_HiSeq_2000	uniform	50	15125081	TGGAATTCTCGGGTGCCAAGG	2013-04-19
GSE46224	GSM1126679	SRR831032	Illumina_HiSeq_2000	uniform	50	12127647	TGGAATTCTCGGGTGCCAAGG	2013-04-19
GSE46224	GSM1126680	SRR831033	Illumina_HiSeq_2000	uniform	50	12491007	TGGAATTCTCGGGTGCCAAGG	2013-04-19
GSE46224	GSM1126681	SRR831034	Illumina_HiSeq_2000	uniform	50	15111317	TGGAATTCTCGGGTGCCAAGG	2013-04-19
GSE46224	GSM1126682	SRR831035	Illumina_HiSeq_2000	uniform	50	15206350	TGGAATTCTCGGGTGCCAAGG	2013-04-19
GSE46224	GSM1126683	SRR831036	Illumina_HiSeq_2000	uniform	50	16446717	TGGAATTCTCGGGTGCCAAGG	2013-04-19
GSE46224	GSM1126684	SRR831037	Illumina_HiSeq_2000	uniform	50	11913879	TGGAATTCTCGGGTGCCAAGG	2013-04-19
GSE46224	GSM1126685	SRR831038	Illumina_HiSeq_2000	uniform	50	8505113	TGGAATTCTCGGGTGCCAAGG	2013-04-19
GSE46224	GSM1126686	SRR831039	Illumina_HiSeq_2000	uniform	50	17247229	TGGAATTCTCGGGTGCCAAGG	2013-04-19
GSE46224	GSM1126687	SRR831040	Illumina_HiSeq_2000	uniform	50	14170014	TGGAATTCTCGGGTGCCAAGG	2013-04-19
GSE46224	GSM1126688	SRR831041	Illumina_HiSeq_2000	uniform	50	11343362	TGGAATTCTCGGGTGCCAAGG	2013-04-19
GSE46224	GSM1126689	SRR831042	Illumina_HiSeq_2000	uniform	50	12292670	TGGAATTCTCGGGTGCCAAGG	2013-04-19
GSE46224	GSM1126690	SRR831043	Illumina_HiSeq_2000	uniform	50	14449499	TGGAATTCTCGGGTGCCAAGG	2013-04-19
GSE46224	GSM1126691	SRR831044	Illumina_HiSeq_2000	uniform	50	13628816	TGGAATTCTCGGGTGCCAAGG	2013-04-19
GSE49279	GSM1196555	SRR944011	Illumina_HiSeq_2000	uniform	34	15729006	ACGGGCTAAT	2013-07-26
GSE49279	GSM1196556	SRR944012	Illumina_HiSeq_2000	uniform	34	14929526	ACGGGCTAAT	2013-07-26
GSE49279	GSM1196557	SRR944013	Illumina_HiSeq_2000	uniform	34	17314224	ACGGGCTAAT	2013-07-26
GSE49279	GSM1196558	SRR944014	Illumina_HiSeq_2000	uniform	34	20218222	ACGGGCTAAT	2013-07-26
GSE49279	GSM1196559	SRR944015	Illumina_HiSeq_2000	uniform	34	9509525	ACGGGCTAAT	2013-07-26
GSE49279	GSM1196560	SRR944016	Illumina_HiSeq_2000	uniform	34	16153169	ACGGGCTAAT	2013-07-26
GSE49279	GSM1196561	SRR944017	Illumina_HiSeq_2000	uniform	34	15074554	ACGGGCTAAT	2013-07-26
GSE49279	GSM1196562	SRR944018	Illumina_HiSeq_2000	uniform	34	12148222	ACGGGCTAAT	2013-07-26
GSE49279	GSM1196563	SRR944019	Illumina_HiSeq_2000	uniform	34	12880601	ACGGGCTAAT	2013-07-26
GSE49279	GSM1196564	SRR944020	Illumina_HiSeq_2000	uniform	34	11325891	ACGGGCTAAT	2013-07-26
GSE49279	GSM1196565	SRR944021	Illumina_HiSeq_2000	uniform	34	16560194	ACGGGCTAAT	2013-07-26
GSE49279	GSM1196566	SRR944022	Illumina_HiSeq_2000	uniform	34	8643897	ACGGGCTAAT	2013-07-26
GSE49279	GSM1196567	SRR944023	Illumina_HiSeq_2000	uniform	34	25084094	ACGGGCTAAT	2013-07-26
GSE49279	GSM1196568	SRR944024	Illumina_HiSeq_2000	uniform	34	26101933	ACGGGCTAAT	2013-07-26
GSE49279	GSM1196569	SRR944025	Illumina_HiSeq_2000	uniform	34	17243266	ACGGGCTAAT	2013-07-26
GSE49279	GSM1196570	SRR944026	Illumina_HiSeq_2000	uniform	34	18233114	ACGGGCTAAT	2013-07-26
GSE49279	GSM1196571	SRR944027	Illumina_HiSeq_2000	uniform	34	14114688	ACGGGCTAAT	2013-07-26
GSE49279	GSM1196572	SRR944028	Illumina_HiSeq_2000	uniform	34	16238271	ACGGGCTAAT	2013-07-26
GSE49279	GSM1196573	SRR944029	Illumina_HiSeq_2000	uniform	34	15343481	ACGGGCTAAT	2013-07-26
GSE49279	GSM1196574	SRR944030	Illumina_HiSeq_2000	uniform	34	15234625	ACGGGCTAAT	2013-07-26
GSE49279	GSM1196575	SRR944031	Illumina_HiSeq_2000	uniform	34	17003334	ACGGGCTAAT	2013-07-26
GSE49279	GSM1196576	SRR944032	Illumina_HiSeq_2000	uniform	34	16383378	ACGGGCTAAT	2013-07-26
GSE49279	GSM1196577	SRR944033	Illumina_HiSeq_2000	uniform	36	15255691	ACGGGCTAAT	2013-07-26
GSE49279	GSM1196578	SRR944034	Illumina_HiSeq_2000	uniform	36	22251375	ACGGGCTAAT	2013-07-26
GSE49279	GSM1196579	SRR944035	Illumina_HiSeq_2000	uniform	34	9413433	ACGGGCTAAT	2013-07-26
GSE49279	GSM1196580	SRR944036	Illumina_HiSeq_2000	uniform	34	10600048	ACGGGCTAAT	2013-07-26
GSE49279	GSM1196581	SRR944037	Illumina_HiSeq_2000	uniform	34	13741377	ACGGGCTAAT	2013-07-26
GSE49279	GSM1196582	SRR944038	Illumina_HiSeq_2000	uniform	34	13510310	ACGGGCTAAT	2013-07-26
GSE49279	GSM1196583	SRR944039	Illumina_HiSeq_2000	uniform	34	12897503	ACGGGCTAAT	2013-07-26
GSE49279	GSM1196584	SRR944040	Illumina_HiSeq_2000	uniform	34	14234521	ACGGGCTAAT	2013-07-26
GSE49279	GSM1196585	SRR944041	Illumina_HiSeq_2000	uniform	34	12686792	ACGGGCTAAT	2013-07-26
GSE49279	GSM1196586	SRR944042	Illumina_HiSeq_2000	uniform	34	15474057	ACGGGCTAAT	2013-07-26
GSE49279	GSM1196587	SRR944043	Illumina_HiSeq_2000	uniform	34	11057075	ACGGGCTAAT	2013-07-26
GSE49279	GSM1196588	SRR944044	Illumina_HiSeq_2000	uniform	34	10131425	ACGGGCTAAT	2013-07-26
GSE49279	GSM1196589	SRR944045	Illumina_HiSeq_2000	uniform	34	11830887	ACGGGCTAAT	2013-07-26
GSE49279	GSM1196590	SRR944046	Illumina_HiSeq_2000	uniform	34	12603683	ACGGGCTAAT	2013-07-26
GSE49279	GSM1196591	SRR944047	Illumina_HiSeq_2000	uniform	34	18050596	ACGGGCTAAT	2013-07-26
GSE49279	GSM1196592	SRR944048	Illumina_HiSeq_2000	uniform	34	20612223	ACGGGCTAAT	2013-07-26
GSE49279	GSM1196593	SRR944049	Illumina_HiSeq_2000	uniform	34	17323615	ACGGGCTAAT	2013-07-26
GSE49279	GSM1196594	SRR944050	Illumina_HiSeq_2000	uniform	34	20331081	ACGGGCTAAT	2013-07-26
GSE49279	GSM1196595	SRR944051	Illumina_HiSeq_2000	uniform	34	17353940	ACGGGCTAAT	2013-07-26
GSE49279	GSM1196596	SRR944052	Illumina_HiSeq_2000	uniform	34	14575289	ACGGGCTAAT	2013-07-26
GSE49279	GSM1196597	SRR944053	Illumina_HiSeq_2000	uniform	34	12165154	ACGGGCTAAT	2013-07-26
GSE49279	GSM1196598	SRR944054	Illumina_HiSeq_2000	uniform	34	14742571	ACGGGCTAAT	2013-07-26
GSE49279	GSM1196599	SRR944055	Illumina_HiSeq_2000	uniform	34	17980150	ACGGGCTAAT	2013-07-26
GSE49279	GSM1196600	SRR944056	Illumina_HiSeq_2000	uniform	34	18983816	ACGGGCTAAT	2013-07-26
GSE49279	GSM1196601	SRR944057	Illumina_HiSeq_2000	uniform	34	13697038	ACGGGCTAAT	2013-07-26
GSE49279	GSM1196602	SRR944058	Illumina_HiSeq_2000	uniform	34	15498854	ACGGGCTAAT	2013-07-26
GSE49279	GSM1196603	SRR944059	Illumina_HiSeq_2000	uniform	34	14449060	ACGGGCTAAT	2013-07-26
GSE49279	GSM1196604	SRR944060	Illumina_HiSeq_2000	uniform	34	13382637	ACGGGCTAAT	2013-07-26
GSE49279	GSM1196605	SRR944061	Illumina_HiSeq_2000	uniform	34	18176412	ACGGGCTAAT	2013-07-26
GSE49279	GSM1196606	SRR944062	Illumina_HiSeq_2000	uniform	34	15004675	ACGGGCTAAT	2013-07-26
GSE49279	GSM1196607	SRR944063	Illumina_HiSeq_2000	uniform	34	16311057	ACGGGCTAAT	2013-07-26
GSE49279	GSM1196608	SRR944064	Illumina_HiSeq_2000	uniform	34	18803118	ACGGGCTAAT	2013-07-26
GSE49279	GSM1196609	SRR944065	Illumina_HiSeq_2000	uniform	34	15705973	ACGGGCTAAT	2013-07-26
GSE49279	GSM1196610	SRR944066	Illumina_HiSeq_2000	uniform	34	23715672	ACGGGCTAAT	2013-07-26
GSE49279	GSM1196611	SRR944067	Illumina_HiSeq_2000	uniform	34	24367079	ACGGGCTAAT	2013-07-26
GSE49279	GSM1196612	SRR944068	Illumina_HiSeq_2000	uniform	34	14313870	ACGGGCTAAT	2013-07-26
GSE49279	GSM1196613	SRR944069	Illumina_HiSeq_2000	uniform	34	15009426	ACGGGCTAAT	2013-07-26
GSE49279	GSM1196614	SRR944070	Illumina_HiSeq_2000	uniform	34	14965420	ACGGGCTAAT	2013-07-26
GSE49279	GSM1196615	SRR944071	Illumina_HiSeq_2000	uniform	34	17385216	ACGGGCTAAT	2013-07-26
GSE49279	GSM1196616	SRR944072	Illumina_HiSeq_2000	uniform	34	13141647	ACGGGCTAAT	2013-07-26
GSE49279	GSM1196617	SRR944073	Illumina_HiSeq_2000	uniform	34	19752183	ACGGGCTAAT	2013-07-26
GSE49279	GSM1196618	SRR944074	Illumina_HiSeq_2000	uniform	34	14229945	ACGGGCTAAT	2013-07-26
GSE49279	GSM1196619	SRR944075	Illumina_HiSeq_2000	uniform	34	15424649	ACGGGCTAAT	2013-07-26
GSE49279	GSM1196620	SRR944076	Illumina_HiSeq_2000	uniform	34	16307668	ACGGGCTAAT	2013-07-26
GSE49279	GSM1196621	SRR944077	Illumina_HiSeq_2000	uniform	34	12919057	ACGGGCTAAT	2013-07-26
GSE49279	GSM1196622	SRR944078	Illumina_HiSeq_2000	uniform	34	15704211	ACGGGCTAAT	2013-07-26
GSE49279	GSM1196623	SRR944079	Illumina_HiSeq_2000	uniform	34	12374324	ACGGGCTAAT	2013-07-26
GSE49279	GSM1196624	SRR944080	Illumina_HiSeq_2000	uniform	34	19473977	ACGGGCTAAT	2013-07-26
GSE49279	GSM1196625	SRR944081	Illumina_HiSeq_2000	uniform	34	17221599	ACGGGCTAAT	2013-07-26
GSE49279	GSM1196626	SRR944082	Illumina_HiSeq_2000	uniform	34	17769792	ACGGGCTAAT	2013-07-26
GSE49279	GSM1196627	SRR944083	Illumina_HiSeq_2000	uniform	34	24092776	ACGGGCTAAT	2013-07-26
GSE49279	GSM1196628	SRR944084	Illumina_HiSeq_2000	uniform	34	14747877	ACGGGCTAAT	2013-07-26
GSE49279	GSM1196629	SRR944085	Illumina_HiSeq_2000	uniform	34	16447771	ACGGGCTAAT	2013-07-26
GSE49279	GSM1196630	SRR944086	Illumina_HiSeq_2000	uniform	34	9042225	ACGGGCTAAT	2013-07-26
GSE49279	GSM1196631	SRR944087	Illumina_HiSeq_2000	uniform	34	12084519	ACGGGCTAAT	2013-07-26
GSE49279	GSM1196632	SRR944088	Illumina_HiSeq_2000	uniform	34	12406378	ACGGGCTAAT	2013-07-26
GSE49558	GSM1201748	SRR948071	Illumina_HiSeq_2500	uniform	51	4000000	TGGAATTCTCGGGTGCCAAGG	2013-08-05
GSE49558	GSM1201749	SRR948072	Illumina_HiSeq_2500	uniform	51	4000000	TGGAATTCTCGGGTGCCAAGG	2013-08-05
GSE49558	GSM1201750	SRR948073	Illumina_HiSeq_2500	uniform	51	4000000	TGGAATTCTCGGGTGCCAAGG	2013-08-05
GSE49558	GSM1201751	SRR948074	Illumina_HiSeq_2500	uniform	51	4000000	TGGAATTCTCGGGTGCCAAGG	2013-08-05
GSE49558	GSM1201752	SRR948075	Illumina_HiSeq_2500	uniform	51	4000000	TGGAATTCTCGGGTGCCAAGG	2013-08-05
GSE49558	GSM1201753	SRR948076	Illumina_HiSeq_2500	uniform	51	4000000	TGGAATTCTCGGGTGCCAAGG	2013-08-05
GSE49558	GSM1201754	SRR948077	Illumina_HiSeq_2500	uniform	51	4000000	TGGAATTCTCGGGTGCCAAGG	2013-08-05
GSE49558	GSM1201755	SRR948078	Illumina_HiSeq_2500	uniform	51	4000000	TGGAATTCTCGGGTGCCAAGG	2013-08-05
GSE49558	GSM1201756	SRR948079	Illumina_HiSeq_2500	uniform	51	4000000	TGGAATTCTCGGGTGCCAAGG	2013-08-05
GSE49558	GSM1201757	SRR948080	Illumina_HiSeq_2500	uniform	51	4000000	TGGAATTCTCGGGTGCCAAGG	2013-08-05
GSE49558	GSM1201758	SRR948081	Illumina_HiSeq_2500	uniform	51	4000000	TGGAATTCTCGGGTGCCAAGG	2013-08-05
GSE49558	GSM1201759	SRR948082	Illumina_HiSeq_2500	uniform	51	4000000	TGGAATTCTCGGGTGCCAAGG	2013-08-05
GSE53451	GSM1293751	SRR1054269	Illumina_HiSeq_2000	uniform	101	26018008	AGATCGGAAGAGCACACGTCT	2013-12-18
GSE53451	GSM1293752	SRR1054270	Illumina_HiSeq_2000	uniform	101	23881922	AGATCGGAAGAGCACACGTCT	2013-12-18
GSE53451	GSM1293753	SRR1054271	Illumina_HiSeq_2000	uniform	101	35435498	AGATCGGAAGAGCACACGTCT	2013-12-18
GSE53451	GSM1293754	SRR1054272	Illumina_HiSeq_2000	uniform	101	28340366	AGATCGGAAGAGCACACGTCT	2013-12-18
GSE53451	GSM1293755	SRR1054273	Illumina_HiSeq_2000	uniform	101	32908376	AGATCGGAAGAGCACACGTCT	2013-12-18
GSE53451	GSM1293756	SRR1054274	Illumina_HiSeq_2000	uniform	101	30682294	AGATCGGAAGAGCACACGTCT	2013-12-18
GSE53451	GSM1293757	SRR1054275	Illumina_HiSeq_2000	uniform	101	26012598	AGATCGGAAGAGCACACGTCT	2013-12-18
GSE53451	GSM1293758	SRR1054276	Illumina_HiSeq_2000	uniform	101	14012490	AGATCGGAAGAGCACACGTCT	2013-12-18
GSE53451	GSM1293759	SRR1054277	Illumina_HiSeq_2000	uniform	101	11590014	AGATCGGAAGAGCACACGTCT	2013-12-18
GSE53451	GSM1293760	SRR1054278	Illumina_HiSeq_2000	uniform	101	8277380	AGATCGGAAGAGCACACGTCT	2013-12-18
GSE53451	GSM1293761	SRR1054279	Illumina_HiSeq_2000	uniform	101	13053976	AGATCGGAAGAGCACACGTCT	2013-12-18
GSE53451	GSM1293762	SRR1054280	Illumina_HiSeq_2000	uniform	101	16333016	AGATCGGAAGAGCACACGTCT	2013-12-18
GSE53451	GSM1293763	SRR1054281	Illumina_HiSeq_2000	uniform	101	17300994	AGATCGGAAGAGCACACGTCT	2013-12-18
GSE53451	GSM1293764	SRR1054282	Illumina_HiSeq_2000	uniform	101	7666750	AGATCGGAAGAGCACACGTCT	2013-12-18
GSE56076	GSM1354722	SRR1200701	Illumina_HiSeq_2000	uniform	50	38822885	AGATCGGAAGAGCACACGTCTGAACTCCAGTCAC	2014-03-20
GSE56076	GSM1354723	SRR1200702	Illumina_HiSeq_2000	uniform	50	2423864	AGATCGGAAGAGCACACGTCTGAACTCCAGTCAC	2014-03-20
GSE56076	GSM1354724	SRR1200703	Illumina_HiSeq_2000	uniform	50	37871576	AGATCGGAAGAGCACACGTCTGAACTCCAGTCAC	2014-03-20
GSE56076	GSM1354725	SRR1200704	Illumina_HiSeq_2000	uniform	50	45110066	AGATCGGAAGAGCACACGTCTGAACTCCAGTCAC	2014-03-20
GSE56076	GSM1354726	SRR1200705	Illumina_HiSeq_2000	uniform	50	28607919	AGATCGGAAGAGCACACGTCTGAACTCCAGTCAC	2014-03-20
GSE56076	GSM1354727	SRR1200706	Illumina_HiSeq_2000	uniform	50	42992069	AGATCGGAAGAGCACACGTCTGAACTCCAGTCAC	2014-03-20
GSE56076	GSM1354728	SRR1200707	Illumina_HiSeq_2000	uniform	50	36829541	AGATCGGAAGAGCACACGTCTGAACTCCAGTCAC	2014-03-20
GSE56076	GSM1354729	SRR1200708	Illumina_HiSeq_2000	uniform	50	35143984	AGATCGGAAGAGCACACGTCTGAACTCCAGTCAC	2014-03-20
GSE56076	GSM1354730	SRR1200709	Illumina_HiSeq_2000	uniform	50	37741772	AGATCGGAAGAGCACACGTCTGAACTCCAGTCAC	2014-03-20
GSE56076	GSM1354731	SRR1200710	Illumina_HiSeq_2000	uniform	50	31479835	AGATCGGAAGAGCACACGTCTGAACTCCAGTCAC	2014-03-20
GSE56076	GSM1354732	SRR1200711	Illumina_HiSeq_2000	uniform	50	34659167	AGATCGGAAGAGCACACGTCTGAACTCCAGTCAC	2014-03-20
GSE56076	GSM1354733	SRR1200712	Illumina_HiSeq_2000	uniform	50	36808724	AGATCGGAAGAGCACACGTCTGAACTCCAGTCAC	2014-03-20
GSE56152	GSM1356720	SRR1203788	Illumina_HiSeq_2000	uniform	50	19146354	TGGAATTCTCGGGTGCCAAGG	2014-03-24
GSE56152	GSM1356721	SRR1203789	Illumina_HiSeq_2000	uniform	50	15587158	TGGAATTCTCGGGTGCCAAGG	2014-03-24
GSE56152	GSM1356722	SRR1203790	Illumina_HiSeq_2000	uniform	50	15245769	TGGAATTCTCGGGTGCCAAGG	2014-03-24
GSE56152	GSM1356723	SRR1203791	Illumina_HiSeq_2000	uniform	50	13552594	TGGAATTCTCGGGTGCCAAGG	2014-03-24
GSE56152	GSM1356724	SRR1203792	Illumina_HiSeq_2000	uniform	50	15398151	TGGAATTCTCGGGTGCCAAGG	2014-03-24
GSE56152	GSM1356725	SRR1203793	Illumina_HiSeq_2000	uniform	50	13503861	TGGAATTCTCGGGTGCCAAGG	2014-03-24
GSE57381	GSM1381481	SRR1273998	Illumina_HiSeq_2000	uniform	50	10821356	TGGAATTCTCGGGTGCCAAGGAACTCCAGTCAC	2014-05-07
GSE57381	GSM1381482	SRR1273999	Illumina_HiSeq_2000	uniform	50	9291483	TGGAATTCTCGGGTGCCAAGGAACTCCAGTCAC	2014-05-07
GSE57381	GSM1381483	SRR1274000	Illumina_HiSeq_2000	uniform	50	46966400	TGGAATTCTCGGGTGCCAAGGAACTCCAGTCAC	2014-05-07
GSE57381	GSM1381484	SRR1274001	Illumina_HiSeq_2000	uniform	50	5828998	TGGAATTCTCGGGTGCCAAGGAACTCCAGTCAC	2014-05-07
GSE57381	GSM1381485	SRR1274002	Illumina_HiSeq_2000	uniform	50	6873591	TGGAATTCTCGGGTGCCAAGGAACTCCAGTCAC	2014-05-07
GSE57381	GSM1381486	SRR1274003	Illumina_HiSeq_2000	uniform	50	24774468	TGGAATTCTCGGGTGCCAAGGAACTCCAGTCAC	2014-05-07
GSE57381	GSM1381487	SRR1274004	Illumina_HiSeq_2000	uniform	50	18296524	TGGAATTCTCGGGTGCCAAGGAACTCCAGTCAC	2014-05-07
GSE57381	GSM1381488	SRR1274005	Illumina_HiSeq_2000	uniform	50	22491772	TGGAATTCTCGGGTGCCAAGGAACTCCAGTCAC	2014-05-07
GSE57381	GSM1381489	SRR1274006	Illumina_HiSeq_2000	uniform	50	11570342	TGGAATTCTCGGGTGCCAAGGAACTCCAGTCAC	2014-05-07
GSE57381	GSM1381490	SRR1274007	Illumina_HiSeq_2000	uniform	50	12591531	TGGAATTCTCGGGTGCCAAGGAACTCCAGTCAC	2014-05-07
GSE57381	GSM1381491	SRR1274008	Illumina_HiSeq_2000	uniform	50	20206632	TGGAATTCTCGGGTGCCAAGGAACTCCAGTCAC	2014-05-07
GSE57381	GSM1381492	SRR1274009	Illumina_HiSeq_2000	uniform	50	17794768	TGGAATTCTCGGGTGCCAAGGAACTCCAGTCAC	2014-05-07
GSE57381	GSM1381493	SRR1274010	Illumina_HiSeq_2000	uniform	50	15752764	TGGAATTCTCGGGTGCCAAGGAACTCCAGTCAC	2014-05-07
GSE57381	GSM1381494	SRR1274011	Illumina_HiSeq_2000	uniform	50	17277418	TGGAATTCTCGGGTGCCAAGGAACTCCAGTCAC	2014-05-07
GSE57381	GSM1381495	SRR1274012	Illumina_HiSeq_2000	uniform	50	20257871	TGGAATTCTCGGGTGCCAAGGAACTCCAGTCAC	2014-05-07
GSE57381	GSM1381496	SRR1274013	Illumina_HiSeq_2000	uniform	50	31538966	TGGAATTCTCGGGTGCCAAGGAACTCCAGTCAC	2014-05-07
GSE57381	GSM1381497	SRR1274014	Illumina_HiSeq_2000	uniform	50	12336363	TGGAATTCTCGGGTGCCAAGGAACTCCAGTCAC	2014-05-07
GSE57381	GSM1381498	SRR1274015	Illumina_HiSeq_2000	uniform	50	11770001	TGGAATTCTCGGGTGCCAAGGAACTCCAGTCAC	2014-05-07
GSE57381	GSM1381499	SRR1274016	Illumina_HiSeq_2000	uniform	50	20007724	TGGAATTCTCGGGTGCCAAGGAACTCCAGTCAC	2014-05-07
GSE57381	GSM1381500	SRR1274017	Illumina_HiSeq_2000	uniform	50	20676421	TGGAATTCTCGGGTGCCAAGGAACTCCAGTCAC	2014-05-07
GSE61458	GSM1505244	SRR1575597	Illumina_MiSeq	uniform	69	5161575	TGGAATTC	2014-09-16
GSE61458	GSM1505245	SRR1575598	Illumina_MiSeq	uniform	60	1447457	TGGAATTC	2014-09-16
GSE61458	GSM1505246	SRR1575599	Illumina_MiSeq	uniform	69	2315342	TGGAATTC	2014-09-16
GSE63501	GSM1551173	SRR1658345	Illumina_HiSeq_2500	index	51	47794600	TTAAGTCGTATGCCGTCTTCTGCTTG	2014-11-20
GSE63501	GSM1551174	SRR1658346	Illumina_HiSeq_2500	index	51	5581107	TAACGTCGTATGCCGTCTTCTGCTTG	2014-11-20
GSE63501	GSM1551175	SRR1658347	Illumina_HiSeq_2500	index	51	11089325	TAATATCGTATGCCGTCTTCTGCTTG	2014-11-20
GSE63501	GSM1551176	SRR1658348	Illumina_HiSeq_2500	index	51	5583181	TAGGATCGTATGCCGTCTTCTGCTTG	2014-11-20
GSE63501	GSM1551177	SRR1658349	Illumina_HiSeq_2500	index	51	13567403	TATCATCGTATGCCGTCTTCTGCTTG	2014-11-20
GSE63501	GSM1551178	SRR1658350	Illumina_HiSeq_2500	index	51	16196652	TGATGTCGTATGCCGTCTTCTGCTTG	2014-11-20
GSE63501	GSM1551179	SRR1658351	Illumina_HiSeq_2500	index	51	11986918	TGTGTTCGTATGCCGTCTTCTGCTTG	2014-11-20
GSE63501	GSM1551180	SRR1658352	Illumina_HiSeq_2500	index	51	46597642	TTACATCGTATGCCGTCTTCTGCTTG	2014-11-20
GSE63501	GSM1551181	SRR1658353	Illumina_HiSeq_2500	index	51	8134357	TCACTTCGTATGCCGTCTTCTGCTTG	2014-11-20
GSE63501	GSM1551182	SRR1658354	Illumina_HiSeq_2500	index	51	8597326	TCATCTCGTATGCCGTCTTCTGCTTG	2014-11-20
GSE63501	GSM1551183	SRR1658355	Illumina_HiSeq_2500	index	51	11897850	TCCACTCGTATGCCGTCTTCTGCTTG	2014-11-20
GSE63501	GSM1551184	SRR1658356	Illumina_HiSeq_2500	index	51	9392211	TCCGTTCGTATGCCGTCTTCTGCTTG	2014-11-20
GSE63501	GSM1551185	SRR1658357	Illumina_HiSeq_2500	index	51	11044943	TCCTATCGTATGCCGTCTTCTGCTTG	2014-11-20
GSE63501	GSM1551186	SRR1658358	Illumina_HiSeq_2500	index	51	13737744	TCGATTCGTATGCCGTCTTCTGCTTG	2014-11-20
GSE63501	GSM1551187	SRR1658359	Illumina_HiSeq_2500	index	51	8126929	TCGCGTCGTATGCCGTCTTCTGCTTG	2014-11-20
GSE63501	GSM1551188	SRR1658360	Illumina_HiSeq_2500	index	51	10105251	TCTCCTCGTATGCCGTCTTCTGCTTG	2014-11-20
GSE64142	GSM1565141	SRR1708906	Illumina_HiSeq_2000	uniform	50	9554925	TGGAATTCTCGGGTGCCAAGG	2014-12-12
GSE64142	GSM1565142	SRR1708907	Illumina_HiSeq_2000	uniform	50	7600117	TGGAATTCTCGGGTGCCAAGG	2014-12-12
GSE64142	GSM1565143	SRR1708908	Illumina_HiSeq_2000	uniform	50	8613873	TGGAATTCTCGGGTGCCAAGG	2014-12-12
GSE64142	GSM1565144	SRR1708909	Illumina_HiSeq_2000	uniform	50	9833352	TGGAATTCTCGGGTGCCAAGG	2014-12-12
GSE64142	GSM1565145	SRR1708910	Illumina_HiSeq_2000	uniform	50	10608242	TGGAATTCTCGGGTGCCAAGG	2014-12-12
GSE64142	GSM1565146	SRR1708911	Illumina_HiSeq_2000	uniform	50	6430037	TGGAATTCTCGGGTGCCAAGG	2014-12-12
GSE64142	GSM1565147	SRR1708912	Illumina_HiSeq_2000	uniform	50	8030392	TGGAATTCTCGGGTGCCAAGG	2014-12-12
GSE64142	GSM1565148	SRR1708913	Illumina_HiSeq_2000	uniform	50	10509919	TGGAATTCTCGGGTGCCAAGG	2014-12-12
GSE64142	GSM1565149	SRR1708914	Illumina_HiSeq_2000	uniform	50	7004041	TGGAATTCTCGGGTGCCAAGG	2014-12-12
GSE64142	GSM1565150	SRR1708915	Illumina_HiSeq_2000	uniform	50	12227934	TGGAATTCTCGGGTGCCAAGG	2014-12-12
GSE64142	GSM1565151	SRR1708916	Illumina_HiSeq_2000	uniform	50	10459858	TGGAATTCTCGGGTGCCAAGG	2014-12-12
GSE64142	GSM1565152	SRR1708917	Illumina_HiSeq_2000	uniform	50	11627748	TGGAATTCTCGGGTGCCAAGG	2014-12-12
GSE64142	GSM1565153	SRR1708918	Illumina_HiSeq_2000	uniform	50	7872123	TGGAATTCTCGGGTGCCAAGG	2014-12-12
GSE64142	GSM1565154	SRR1708919	Illumina_HiSeq_2000	uniform	50	10890429	TGGAATTCTCGGGTGCCAAGG	2014-12-12
GSE64142	GSM1565155	SRR1708920	Illumina_HiSeq_2000	uniform	50	14200501	TGGAATTCTCGGGTGCCAAGG	2014-12-12
GSE64142	GSM1565156	SRR1708921	Illumina_HiSeq_2000	uniform	50	11857869	TGGAATTCTCGGGTGCCAAGG	2014-12-12
GSE64142	GSM1565157	SRR1708922	Illumina_HiSeq_2000	uniform	50	13075666	TGGAATTCTCGGGTGCCAAGG	2014-12-12
GSE64142	GSM1565158	SRR1708923	Illumina_HiSeq_2000	uniform	50	8369421	TGGAATTCTCGGGTGCCAAGG	2014-12-12
GSE64942	GSM1584521	SRR1755245	Illumina_MiSeq	uniform	51	13324993	AGATCGGA	2015-01-13
GSE64942	GSM1584522	SRR1755246	Illumina_MiSeq	uniform	51	16225840	AGATCGGA	2015-01-13
GSE64942	GSM1584523	SRR1755247	Illumina_MiSeq	uniform	51	14196032	AGATCGGA	2015-01-13
GSE64942	GSM1584524	SRR1755248	Illumina_MiSeq	uniform	51	15057631	AGATCGGA	2015-01-13
GSE64942	GSM1584525	SRR1755249	Illumina_MiSeq	uniform	51	14829367	AGATCGGA	2015-01-13
GSE64942	GSM1584527	SRR1755251	Illumina_MiSeq	uniform	51	15849715	AGATCGGA	2015-01-13
GSE64942	GSM1584529	SRR1755253	Illumina_MiSeq	uniform	51	15779905	AGATCGGA	2015-01-13
GSE64942	GSM1584530	SRR1755254	Illumina_MiSeq	uniform	51	13622393	AGATCGGA	2015-01-13
GSE64942	GSM1584531	SRR1755255	Illumina_MiSeq	uniform	51	14499292	AGATCGGA	2015-01-13
GSE64942	GSM1584532	SRR1755256	Illumina_MiSeq	uniform	51	16327251	AGATCGGA	2015-01-13
